# Supplementary material for: Laser capture microdissection enables transcriptomic analysis of dividing and quiescent liver stages of Plasmodium relapsing species
Source: PubMed Central journal article supplement (PMC5516136; doi:10.1111/cmi.12735), 2017-03-13

A

## General microdissection protocol

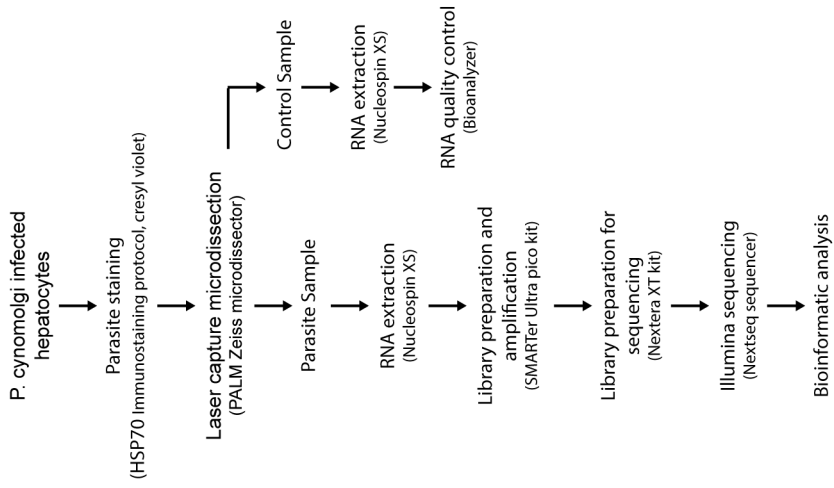

B

## Cresyl violet staining protocol

| Reagents      | Composition                     |
|---------------|---------------------------------|
| Ethanol       | Ethanol absolute                |
| Water         | RNAse free water                |
| Cresyl violet | 1% Cresyl violet in 70% ethanol |
| Step          | Cresyl violet staining          |
| 1             | PBS 1x Wash                     |
| 2             | 95% Ethanol (15 seconds)        |
| 3             | 75% Ethanol (15 seconds)        |
| 4             | 70% Ethanol (15 seconds)        |
| 5             | Cresyl violet (45 seconds)      |
| 6             | 70% Ethanol (15 seconds)        |
| 7             | 75% Ethanol (15 seconds)        |
| 8             | 95% Ethanol (15 seconds)        |
| 9             | 100% Ethanol (15 seconds) x2    |

## Adapted immunostaining protocol

| Reagents          | Composition                                                                               |
|-------------------|-------------------------------------------------------------------------------------------|
| PBS1              | PBS 1x                                                                                    |
| PBS2              | PBS 1x + 40 unit/ml RNase inhibitor                                                       |
| Antibody solution | PBS 1x + BSA 10% + 40 unit/ml RNase inhibitor                                             |
| Step              | Adapted immunostaining                                                                    |
| 1                 | Wash with PBS1                                                                            |
| 2                 | Fix with cold (-20 C) 100% ethanol (5 minutes)                                            |
| 3                 | PBS2 (10 seconds)                                                                         |
| 4                 | 1/25 dilution of monoclonal HSP70 antibody in antibody solution                           |
| 5                 | PBS2 (10 seconds) x2                                                                      |
| 6                 | 1/25 dilution of Alexa 488-conjugated goat anti-mouse immunoglobulin in antibody solution |
| 7                 | PBS2 (10 seconds) x2                                                                      |

C

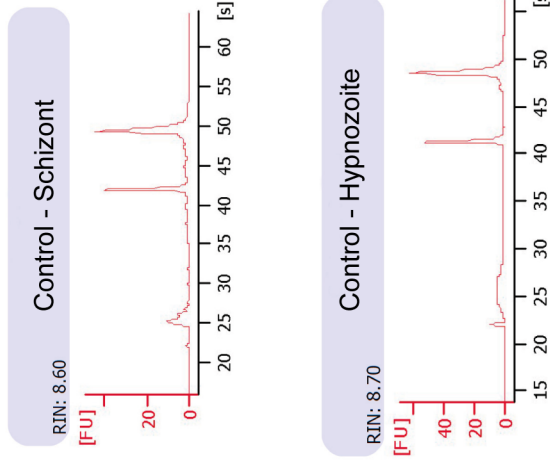

Supplement: CMI-19-na-s002.pdf [file CMI-19-na-s002.pdf]
