# Supplementary material for: Laser capture microdissection enables transcriptomic analysis of dividing and quiescent liver stages of Plasmodium relapsing species
Source: PubMed Central journal article supplement (PMC5516136; doi:10.1111/cmi.12735), 2017-03-13

A

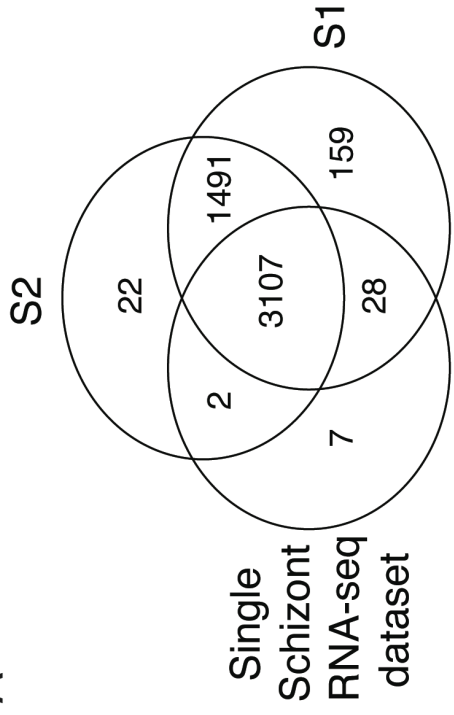

B

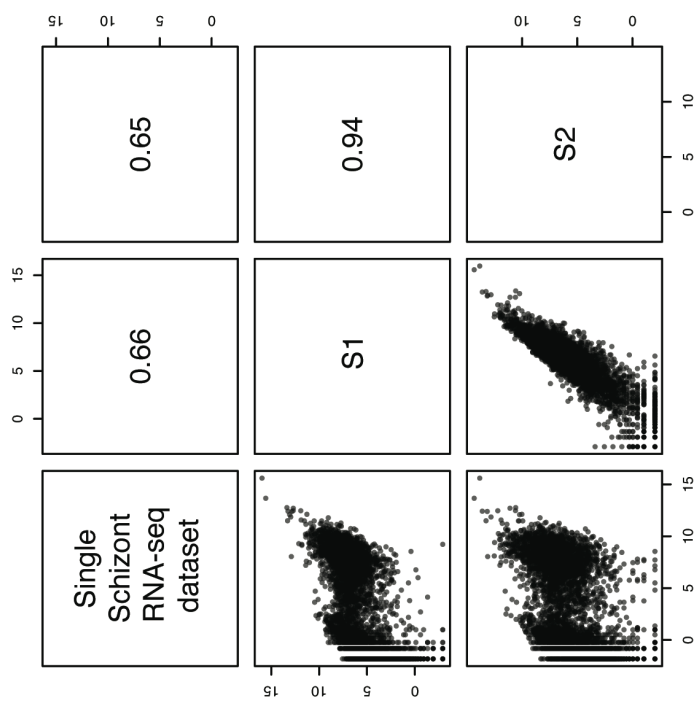

Supplement: CMI-19-na-s004.pdf [file CMI-19-na-s004.pdf]
